# Supplementary material
Source: publisher figshare collection journal article supplement (https://tandf.figshare.com/ndownloader/files/12276653)
Supplement: Supplementary file 1 [file 12276653]

**“ Supporting Information”**

**Tuning of pnicogen and chalcogen bonds by an aerogen-bonding interaction: A comparative *ab initio* study**

Mehdi D. Esrafili*, Parisasadat Mousavian and Fariba Mohammadian-Sabet

*Laboratory of Theoretical Chemistry, Department of Chemistry, University of Maragheh, Maragheh, Iran*

* Corresponding Author. **Phone:** (+98) 4212237955. **Fax:** (+98) 4212276060. **P.O. Box:**5513864596***.* E-mail**: [esrafili@maragheh.ac.ir](mailto:esrafili@maragheh.ac.ir).

**Figure S1.** Optimized structure and the corresponding total energy (Etot, au) of the binary systems

**
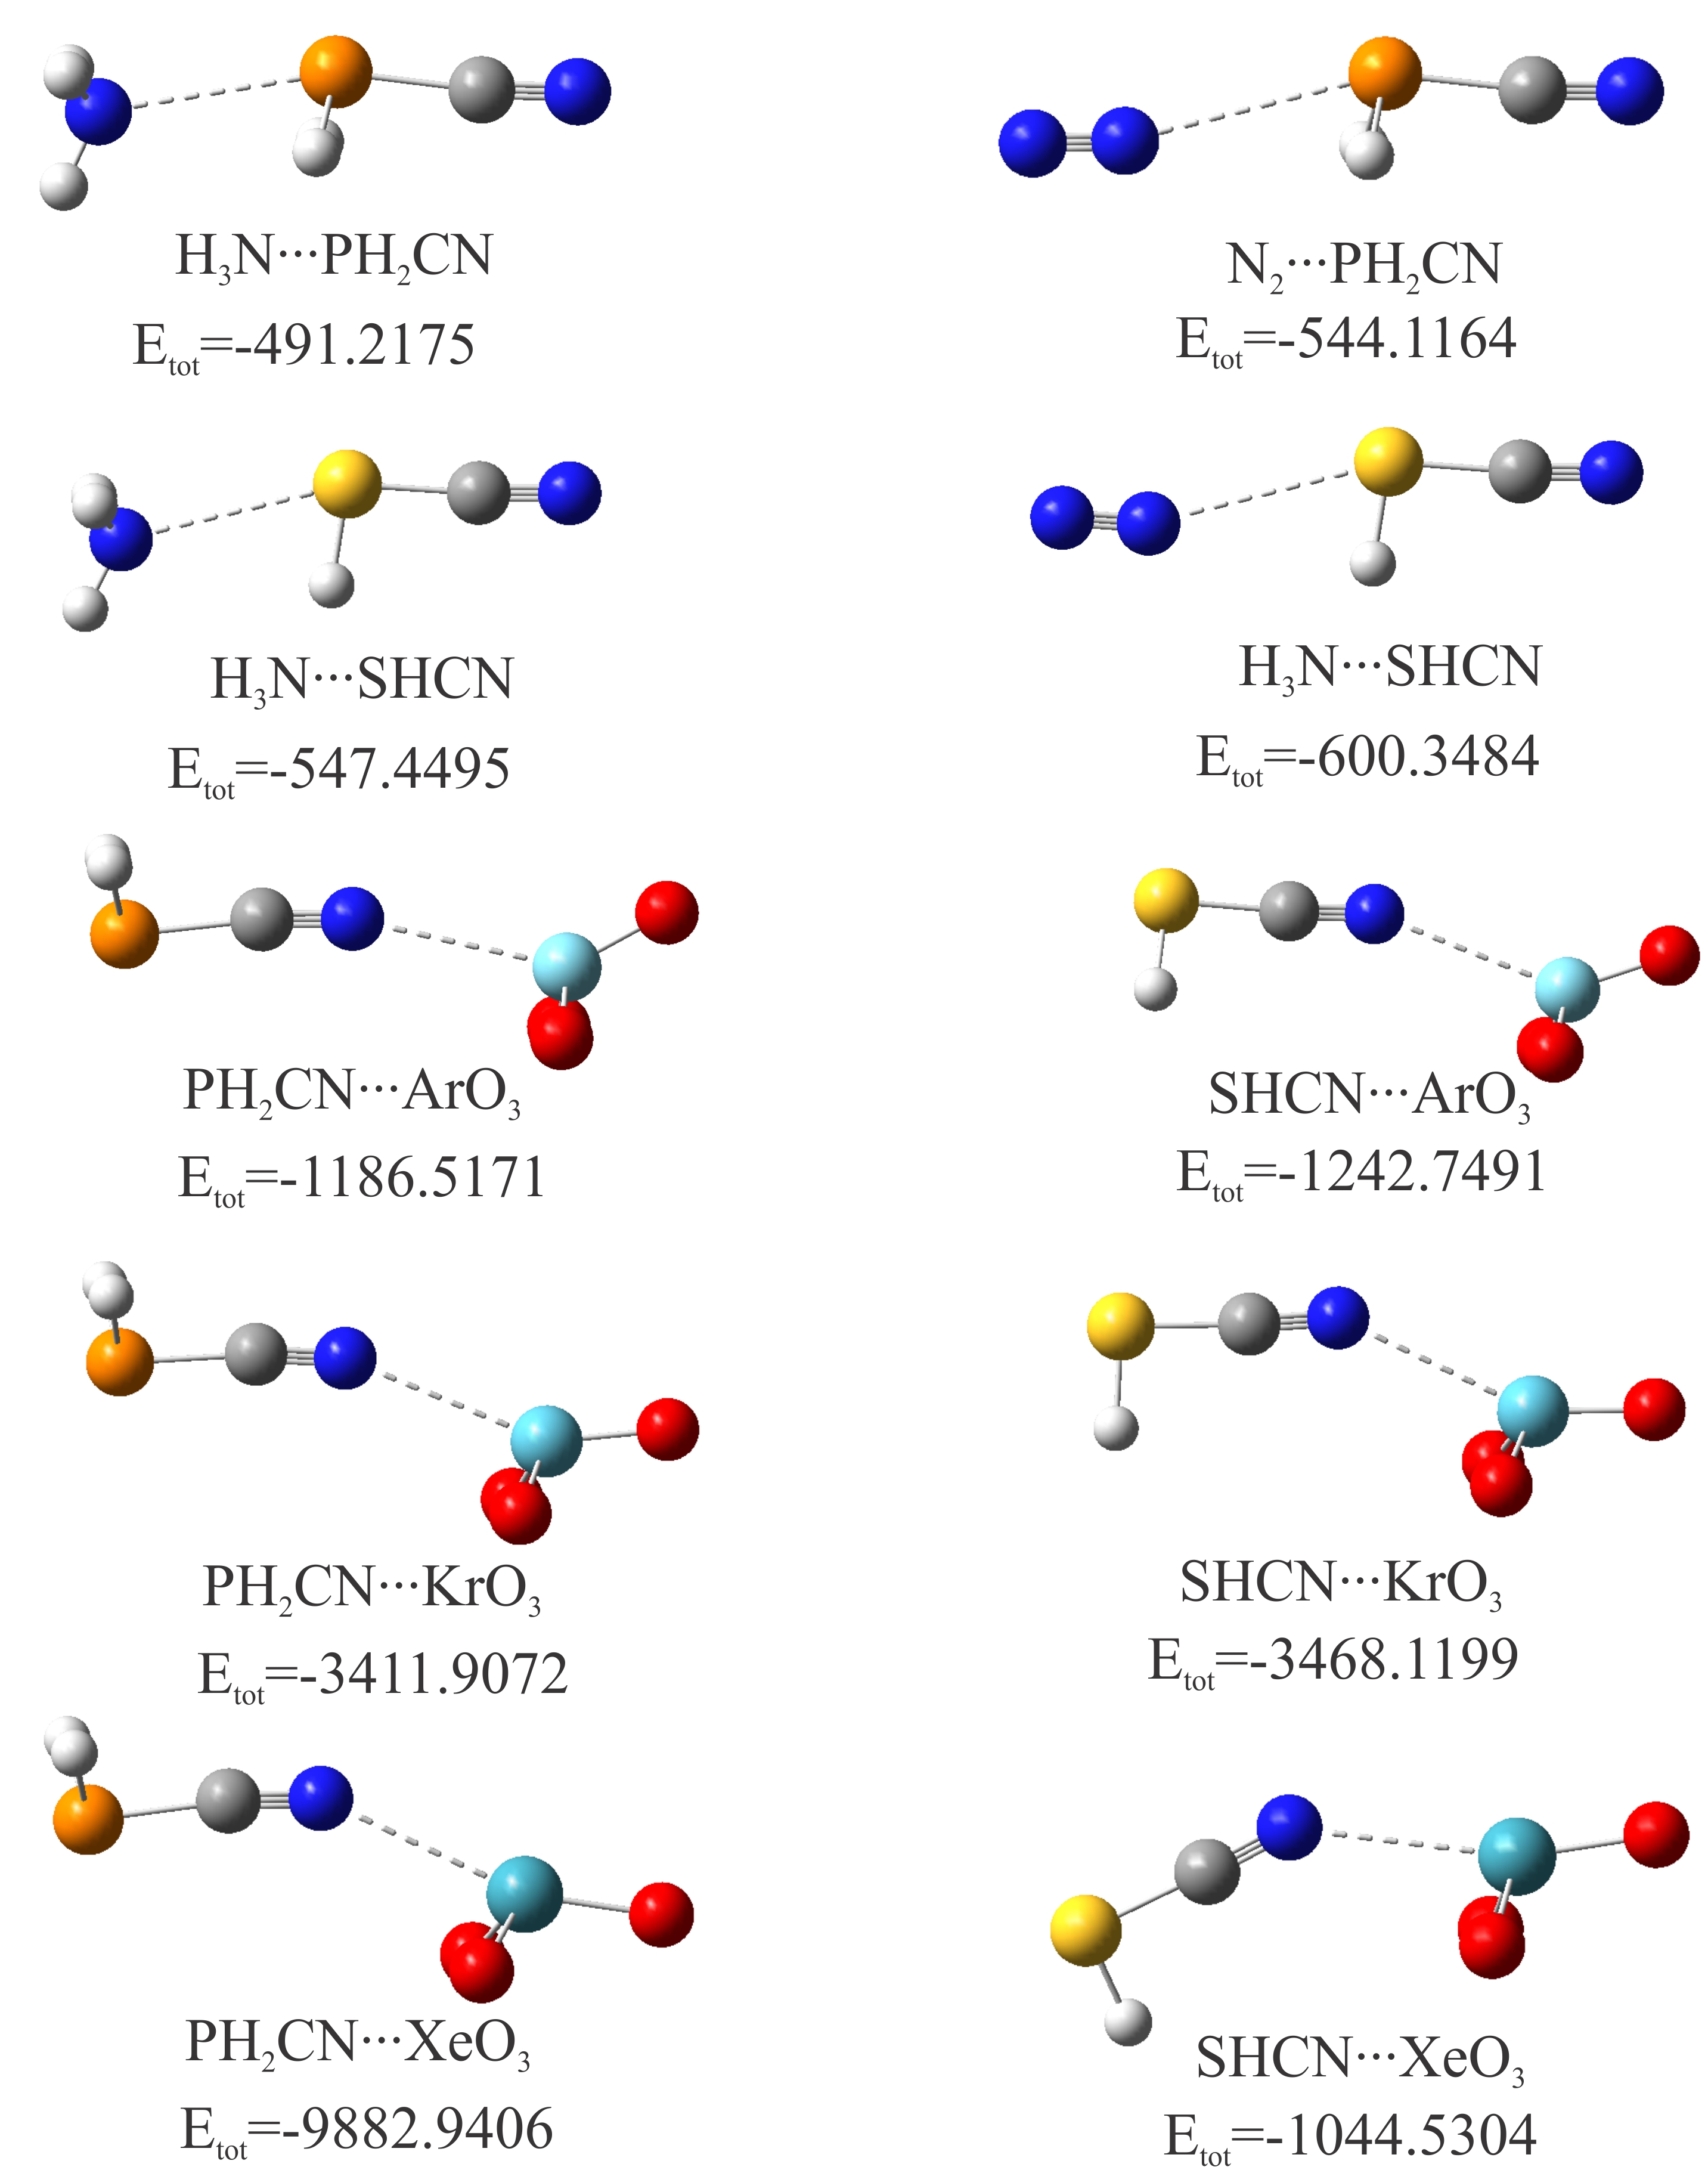
**

**Figure S2.** Optimized structure and the corresponding total energy (Etot, au) of the ternary systems

**
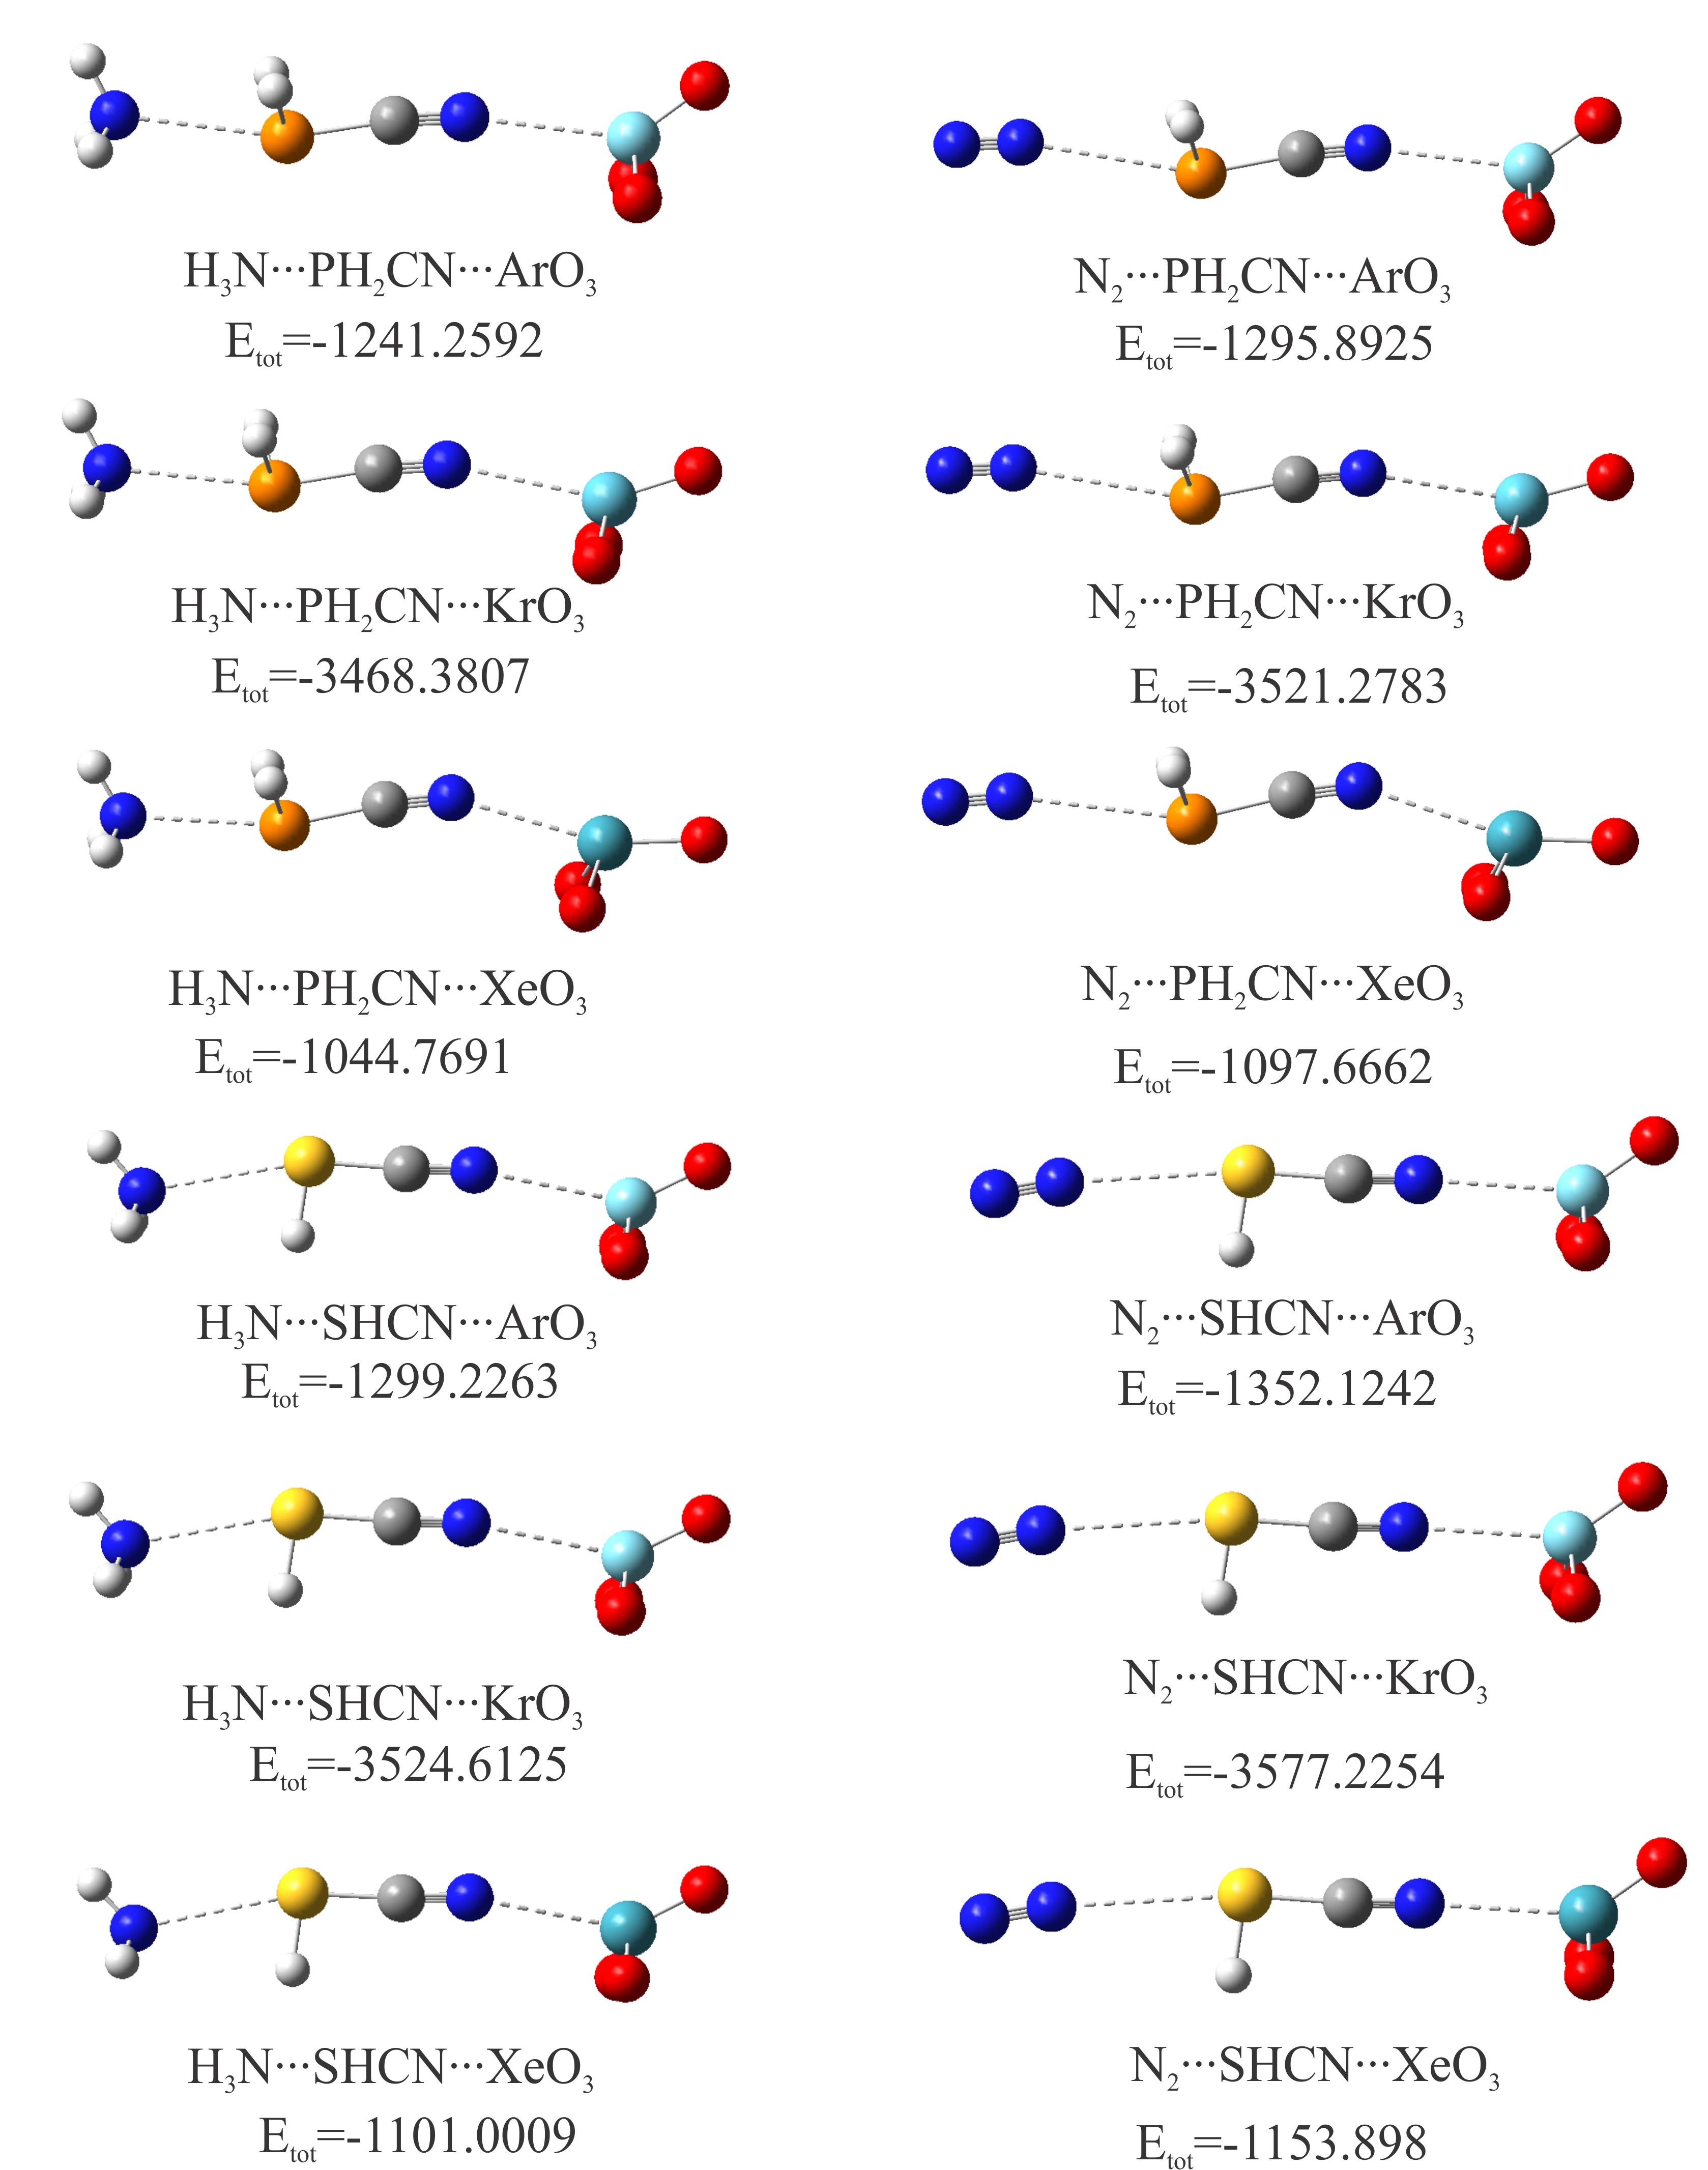
**
